1     **SARS-CoV-2 Omicron neutralization by therapeutic antibodies, convalescent**  
2                                     **sera, and post-mRNA vaccine booster**

3  
4  
5     **One Sentence Summary:** Third dose of Pfizer/BioNTech COVID-19 vaccine significantly  
6     boosts neutralizing antibodies to the Omicron variant compared to a second dose, while  
7     neutralization of Omicron by convalescent sera, two-dose vaccine-elicited sera, or therapeutic  
8     antibodies is variable and often low.

9  
10    **Authors:**

11    Sabrina Lusvarghi<sup>1</sup>, Simon D. Pollett<sup>2,3</sup>, Sabari Nath Neerukonda<sup>1</sup>, Wei Wang<sup>1</sup>, Richard  
12    Wang<sup>1</sup>, Russell Vassell<sup>1</sup>, Nusrat J. Epsi<sup>2,3</sup>, Anthony C Fries<sup>4</sup>, Brian K Agan<sup>2,3</sup>, David A. Lindholm<sup>5,6</sup>,  
13    Christopher J. Colombo<sup>6,7</sup>, Rupal Mody<sup>8</sup>, Evan C. Ewers<sup>9</sup>, Tahaniyat Lalani<sup>2,3,10</sup>, Anuradha  
14    Ganesan<sup>2,3,11</sup>, Emilie Goguet<sup>3,12</sup>, Monique Hollis-Perry<sup>14</sup>, Si'Ana A. Coggins<sup>3,12</sup>, Mark P. Simons<sup>2</sup>, Leah  
15    C. Katzelnick<sup>13</sup>, Gregory Wang<sup>14,15</sup>, David R. Tribble<sup>2</sup>, Lisa Bentley<sup>16</sup>, Ann E. Eakin<sup>17</sup>, Christopher C.  
16    Broder<sup>12</sup>, Karl J. Erlandson<sup>18</sup>, Eric D. Laing<sup>12</sup>, Timothy H. Burgess<sup>2</sup>, Edward Mitre<sup>12</sup>, Carol D. Weiss<sup>1†</sup>

17  
18    **Affiliations:**

19    <sup>1</sup> Division of Viral Products, Office of Vaccine Research and Review, Center for Biologics  
20    Evaluation and Research, U.S. Food and Drug Administration, Silver Spring, Maryland, USA

21    <sup>2</sup> Infectious Diseases Clinical Research Program, Department of Preventive Medicine and Biostatistics,  
22    Uniformed Services University of the Health Sciences, Bethesda, MD, USA

23    <sup>3</sup> Henry M. Jackson Foundation for the Advancement of Military Medicine, Inc., Bethesda, MD, USA

- 24 <sup>4</sup>U.S. Air Force School of Aerospace Medicine, Wright-Patterson, OH, USA
- 25 <sup>5</sup>Brooke Army Medical Center, Joint Base San Antonio-Fort Sam Houston, TX, USA
- 26 <sup>6</sup>Department of Medicine, Uniformed Services University of the Health Sciences, Bethesda, MD, USA
- 27 <sup>7</sup>Madigan Army Medical Center, Joint Base Lewis McChord, WA, USA
- 28 <sup>8</sup>William Beaumont Army Medical Center, El Paso, TX, USA
- 29 <sup>9</sup>Fort Belvoir Community Hospital, Fort Belvoir, VA, USA
- 30 <sup>10</sup>Naval Medical Center Portsmouth, Portsmouth, VA, USA
- 31 <sup>11</sup>Walter Reed National Military Medical Center, Bethesda, MD, USA
- 32 <sup>12</sup>Department of Microbiology and Immunology, Uniformed Services University of the Health Sciences,  
33 Bethesda, MD, USA
- 34 <sup>13</sup>Viral Epidemiology and Immunity Unit, Laboratory of Infectious Diseases, National Institute of Allergy  
35 and Infectious Diseases, National Institutes of Health, Bethesda, MD, USA
- 36 <sup>14</sup>Clinical Trials Center, Infectious Diseases Directorate, Naval Medical Research Center, Silver Spring,  
37 MD, USA
- 38 <sup>15</sup>General Dynamics Information Technology, Falls Church, VA, USA
- 39 <sup>16</sup>Office of the Assistance Secretary for Preparedness and Response, U.S. Department of Human  
40 Health and Services, Washington D.C., USA.
- 41 <sup>17</sup>Division of Microbiology and Infectious Diseases, National Institute of Allergy and Infectious  
42 Disease, National Institutes of Health, Rockville, Maryland, USA.
- 43 <sup>18</sup>Influenza and Emerging Infectious Diseases Division, Biomedical Advanced Research and  
44 Development Authority, U.S. Department of Health and Human Services, Washington, D.C.,  
45 USA.
- 46

47

48 **Abstract:**

49 The rapid spread of the highly contagious Omicron variant of SARS-CoV-2 along with its high  
50 number of mutations in the spike gene has raised alarm about the effectiveness of current  
51 medical countermeasures. To address this concern, we measured neutralizing antibodies against  
52 Omicron in three important settings: (1) post-vaccination sera after two and three immunizations  
53 with the Pfizer/BNT162b2 vaccine, (2) convalescent sera from unvaccinated individuals infected  
54 by different variants, and (3) clinical-stage therapeutic antibodies. Using a pseudovirus  
55 neutralization assay, we found that titers against Omicron were low or undetectable after two  
56 immunizations and in most convalescent sera. A booster vaccination significantly increased titers  
57 against Omicron to levels comparable to those seen against the ancestral (D614G) variant after  
58 two immunizations. Neither age nor sex were associated with differences in post-vaccination  
59 antibody responses. Only three of 24 therapeutic antibodies tested retained their full potency  
60 against Omicron and high-level resistance was seen against fifteen. These findings underscore  
61 the potential benefit of booster mRNA vaccines for protection against Omicron and the need for  
62 additional therapeutic antibodies that are more robust to highly mutated variants.

63 **Main Text:**

64 **INTRODUCTION**

65 In November 2021 a new SARS-CoV-2 variant, named Omicron (Pango lineage B.1.1.529),  
66 was identified as a variant of concern (VOC). Its rapid spread in Africa and unusually high  
67 number of mutations, especially in the spike gene, has triggered intense international efforts to  
68 track the variant's spread and evaluate its effects on the potency of therapeutics and vaccines.  
69 The predominant strain of Omicron has mutations in the spike gene encoding 15 amino acid

70 changes in the receptor binding domain (RBD) of the spike surface protein (G339D, S371L,  
71 S373P, S375F, K417N, N440K, G446S, S477N, T478K, E484A, Q493R, G496S, Q498R,  
72 N501Y, and Y505H). The RBD mediates virus attachment to the ACE2 receptor on target cells  
73 and is the principal target of neutralizing antibodies that contribute to protection against SARS-  
74 CoV-2. Many of these RBD changes have been previously reported to reduce the effectiveness  
75 of several therapeutic neutralizing antibodies (reviewed in Corti et al(1)). A recent study reports  
76 that the full complement of RBD substitutions in the Omicron spike compromises the potency of  
77 over 85% of 247 anti-RBD monoclonal antibodies (mAbs) tested(2). Preliminary reports indicate  
78 substantial immune evasion to two-dose vaccine-elicited sera(3-7), booster-elicited sera(8-16),  
79 genotype-varying convalescent sera(3, 5, 6), and several mAbs(2, 6). However, study  
80 populations and methods vary widely among the studies to date, and many lack critical details  
81 about host characteristics. Moreover, studies have not examined how host demography predicts  
82 these neutralizing humoral responses, and examination of how infection by a broader diversity of  
83 SARS-CoV-2 Delta and non-Delta genotypes is important for further insights into how genetic  
84 diversity may correlate with cross-neutralizing antibody responses.

85 Here we used a pseudovirus neutralization assay(16) to measure antibody neutralization of  
86 SARS-CoV-2 Omicron in three important contexts: (1) antibodies induced after two or three  
87 doses of the Pfizer-BioNTech Covid-19 (Pfizer/BNT162b2 mRNA) vaccine, (2) antibodies  
88 induced from infection by different SARS-CoV-2 variants and (3) therapeutic antibodies under  
89 emergency use authorization (EUA) or in later stages of clinical development. We compared the  
90 magnitude of neutralization escape by Omicron to D614G (referred to as wild type, WT) and  
91 Delta SARS-CoV-2 variants to help inform public health decisions and offer further data toward  
92 correlate of protection research.

93 **RESULTS**

94 **Three immunizations of the Pfizer/BNT162b2 mRNA COVID-19 vaccine significantly**  
95 **boosts neutralizing antibodies to the Omicron variant compared to two-vaccinations.**

96 The emergence of the Omicron variant coincided with recommendations for booster  
97 immunizations, particularly for at risk populations. We studied the neutralization titers of 39  
98 generally healthy, adult healthcare workers participating in the Prospective Assessment of  
99 SARS-CoV-2 Seroconversion study (PASS study, Table 1)(17) who received the full primary  
100 series (1<sup>st</sup> and 2<sup>nd</sup>) and booster (3<sup>rd</sup>) immunizations with the Pfizer/BNT162b2 vaccine. We chose  
101 to study sera at peak responses after the full primary series vaccination rather than after 6 months  
102 because 6-months titers are often very low(10, 18).

103 Neutralization activity against Omicron above the threshold of our assay (1:40 dilution) was  
104 only observed in 12.8% (5/39) of serum samples obtained at a mean of  $30 \pm 11$  days after the 2<sup>nd</sup>  
105 Pfizer/BNT162b2 vaccination (Figure 1A). After the 2<sup>nd</sup> vaccination neutralization titers against  
106 Omicron (geometric mean titer, GMT 22) were 25.5-fold lower than neutralization titers against  
107 WT (GMT 562). By contrast, neutralization titers against Delta (GMT 292) were 1.9-fold lower  
108 than WT. Neutralization titers from the same individuals collected  $43 \pm 17$  days after the 3<sup>rd</sup>  
109 Pfizer/BNT162b2 vaccination were 8.9-fold greater against WT (GMT 5029) compared to titers  
110 after the 2<sup>nd</sup> vaccination. The titers against Omicron after the 3<sup>rd</sup> vaccination (GMT 700) showed  
111 31.8-fold increase compared to titers after the 2<sup>nd</sup> vaccination, whereas titers against Delta after  
112 the 3<sup>rd</sup> vaccination (GMT 1673) were only 5.7-fold higher than the titers after the 2<sup>nd</sup>  
113 vaccination. Importantly, all individuals had measurable neutralizing titers against Omicron after  
114 the 3<sup>rd</sup> vaccination, highlighting the potential for increased protection by a booster vaccine.

115 We also evaluated how sex or age of the individual might affect the titers in sera after  
116 vaccination. We did not observe a trend according to sex or age after the 2<sup>nd</sup> or 3<sup>rd</sup> vaccination  
117 (Figure 1B and 1C, respectively). A total of 17/39 individuals had a positive anti-N (SARS-CoV-  
118 2 nucleoprotein) seroconversion during regular scheduled blood sampling between the 2<sup>nd</sup> and  
119 the 3<sup>rd</sup> immunization(17). No symptoms of COVID-19 were reported by the subjects, possibly  
120 indicative of silent infection or exposure to SARS-CoV-2 or other coronaviruses. We did not  
121 find any trends when comparing differences in neutralizing antibody titers between individuals  
122 who had anti-N seroconversion and those who did not (Figure 1D). To assess the breadth of  
123 neutralization responses against Omicron induced by boosting, we compared the change in titers  
124 against Omicron or Delta relative to WT after the 2<sup>nd</sup> and 3<sup>rd</sup> vaccination. To account for  
125 variability in the antibody titers from one individual to another, we calculated the ratio between  
126 the neutralization titers after the 3<sup>rd</sup> and the 2<sup>nd</sup> vaccination for each variant and plotted this ratio  
127 for Omicron and Delta against WT (Figure 1E). We observed that the ratios of NT<sub>50</sub> titer from  
128 the 3<sup>rd</sup> to the 2<sup>nd</sup> vaccination for Omicron relative to the corresponding ratios for WT were higher  
129 than the ratios for Delta relative to WT, suggesting that the 3<sup>rd</sup> vaccination broadened responses  
130 to the distantly-related variant.

131 **Neutralization of Omicron by convalescent sera from individuals infected by different**  
132 **variants shows lower neutralization titers compared to the infecting variant.**

133 To investigate the potency of infection-induced neutralizing antibodies against Omicron, we  
134 compared neutralization titers against WT, Delta, and Omicron in convalescent sera obtained at a  
135 mean of  $30.2 \pm 9.3$  days post-symptom onset from unvaccinated individuals infected with WT,  
136 Alpha, Beta, or Delta variants who were enrolled in the Epidemiology, Immunology, and  
137 Clinical Characteristics of Emerging Infectious Diseases with Pandemic Potential (EPICC)

138 study(19). Genotypes of the infecting variants were sequenced for all cases (Table 2 and  
139 Supplementary Table). These convalescent sera were complemented by a Beta-convalescent  
140 serum from another protocol.

141 Figure 2 shows that the Delta variant was modestly more resistant to neutralization than WT  
142 by sera from most individuals infected with WT, Alpha, or Beta viruses (1.1 to 1.9-fold), while  
143 neutralization titers were much more reduced against Omicron (2.3 to 70.1- fold). A total of 2/10  
144 and 0/20 individuals infected with WT (B.1 and B.1.2) variants, respectively, had a response  
145 above the threshold against Omicron, whereas 2/5 and 2/2 individuals infected with Alpha  
146 (B.1.1.7) and Beta (B.1.351) variants, respectively, were above threshold. Convalescent sera  
147 from individuals infected with Delta (B.1.617 and AY.14/.25/.44/.47/.62/.74/.119) variants  
148 generally had higher neutralization titers against Delta (2.8 to 13.5-fold) compared to WT,  
149 indicating more focused antibody responses to epitopes in the Delta spike. Convalescent sera  
150 from these Delta-infected individuals showed 22.1 to 74.4-fold lower neutralization titers against  
151 Omicron compared to Delta. However, a total of 6/7 individuals infected with the B.1.617.2  
152 variant and 9/10 individuals infected with an AY variant had titers above threshold against  
153 Omicron.

#### 154 **Boosting reduces apparent antigenic differences between WT and Omicron variants.**

155 We applied antigenic cartography to explore how the convalescent and post-vaccination sera  
156 distinguish the different spike antigens. Antigenic maps were made separately using neutralizing  
157 antibody titers from individuals infected with the different variants or from individuals after the  
158 2<sup>nd</sup> or 3<sup>rd</sup> vaccination (Figure 3). Convalescent sera were more heterogeneous compared to the  
159 post-vaccination, with each convalescent serum clustering closer to the infecting variant, as  
160 expected. The 3<sup>rd</sup> post-vaccination sera were more tightly clustered around WT compared to the

161 2<sup>nd</sup> post-vaccination sera. The antigenic distances between Omicron and WT were large for all  
162 three sera sets, but the antigenic distance between Omicron and WT were smaller after the 3<sup>rd</sup>  
163 vaccination (7.2-fold drop) compared to either convalescent or the 2<sup>nd</sup> vaccination sera (49.4-fold  
164 drop and 39.4-fold drop, respectively), in agreement with the titer changes in Figure 1A. Small  
165 distance changes between WT and Delta were observed for all three sera sets (2.0 to 3.6-fold  
166 difference).

### 167 **The potency of most therapeutic antibody products is compromised against Omicron.**

168 As part of the US government COVID-19 response effort to speed development of  
169 therapeutics for COVID-19, we assessed the neutralization of Omicron by 24 therapeutic  
170 antibody products currently under EUA or in late stages of clinical development. This panel  
171 includes 15 single therapeutic neutralizing antibody products (nAbs), six combination nAbs  
172 (cnAbs) and three polyclonal antibody preparations (pAbs). The manufacturers provided these  
173 clinical products for side-by-side comparisons of potency against variants but required blind  
174 coding of these antibody products for publications. Previously, we reported that several single  
175 substitutions in the spike protein of other variants conferred resistance to some of these  
176 products(20), but a similar assessment has not been performed on the Omicron spike.

177 Figure 4A shows the neutralization curves for each product against WT and Omicron. To  
178 quantify the relative drop in nAb potency we calculated ratios between the 50% inhibitory  
179 concentration of Omicron to WT (Figure 4B). These ratios do not account for the absolute  
180 potencies of the nAbs but do allow for a uniform comparison of the changes in potency against  
181 Omicron relative to WT for all the antibody products. We note that the majority of successful  
182 clinical trials were performed when predominant strains had a ratio of near 1 compared to WT.  
183 However, absolute potency using IC<sub>50</sub> ng/ml as a measure has not been established as a correlate



184 of protection. We defined ratios between of 5 to 50 as a benchmark for partial or moderate  
185 resistance and ratios of  $> 50$  as a benchmark for more complete resistance relative to WT. While  
186 the clinical relevance of the  $IC_{50}$  changes has not been determined for any *in vitro* assay, these  
187 cutoffs were chosen because the therapeutic levels of antibody therapeutics may be high enough  
188 to overcome low levels of resistance. By the fold-change measure, only three of 15 nAbs  
189 retained near full potency against Omicron compared to WT, and only one retained partial  
190 potency. Two cnAbs retained partial potency, while the remaining four cnAbs showed complete  
191 loss of neutralization potency. All three pAbs showed reduced neutralization potency (ratios 13-  
192 17) against Omicron, in agreement with the data from convalescent and vaccinated individuals.  
193 These findings raise concerns that many of the available therapeutic antibody products may not  
194 be effective against Omicron.

## 195 **DISCUSSION**

196 Neutralizing antibodies are widely accepted as an important component of protection against  
197 SARS-CoV-2 infection and disease (COVID-19), but efforts to assess antibody titers that  
198 correlate with protection are complicated by many factors. These include potential redundancy  
199 and synergism of different components of the humoral, cellular, and innate immune system, and  
200 differences in variant fitness and host genetics, age, and prior immunity. The risk of infection can  
201 also be confounded by human behavior and local public health measures, while measurements of  
202 antibody titers can vary with different laboratory methods. Therefore, differences in study  
203 populations and laboratory methods are important considerations for assessing the impact of  
204 immune evasion by Omicron on medical countermeasures.

205 Here, using the same lentiviral pseudovirus neutralization platform we measured the change  
206 in potency of 24 clinical-stage therapeutic antibodies against Omicron compared to WT (D614G)

207 and compared neutralizing antibodies in sera from two well-characterized cohorts of subjects in  
208 prospective clinical studies. Our findings show that most vaccinated individuals have low or  
209 undetectable titers against Omicron after the second Pfizer/BNT162b2 vaccination, similar to  
210 findings reported by others(3-7). However, the third vaccination significantly increased  
211 neutralizing titers to levels significantly higher than those elicited by the second vaccination, in  
212 agreement with other preliminary studies(8-14). It is notable that the post-2<sup>nd</sup> vaccination and  
213 post-3<sup>rd</sup> vaccination sampling times were similar, indicating that this boost does not simply  
214 reflect time since last vaccine. We found no association between sex or age with these  
215 neutralizing immune responses, although it is important to note that the study samples were from  
216 generally healthy adults, and that the post-vaccine-dose sampling time was overall short ( $43 \pm 17$   
217 days). It has been shown that infection followed by vaccination results in neutralizing antibody  
218 titers comparable or higher to titers after two vaccinations(3, 10, 14, 21). The PASS study  
219 included anti-N antibody testing on all blood samples for detection of silent infections. The  
220 neutralizing antibody titers among the 17 asymptomatic individuals who seroconverted for N  
221 antibodies between the 2<sup>nd</sup> and 3<sup>rd</sup> immunization were not higher than those who did not  
222 seroconvert. Other studies have shown high antibody titers in convalescent individuals after the  
223 1<sup>st</sup> or 2<sup>nd</sup> vaccination(10, 11). We did not see an increase after the 3<sup>rd</sup> vaccination in individuals  
224 who seroconverted for N-antibodies. This may be due to reduced antigen load from incident  
225 asymptomatic infection or having reached a maximum response after vaccination.

226 The antigenic cartography analysis suggests that the Omicron variant appears to be  
227 antigenically distant from WT and Delta, but this distance seems to decrease after the 3<sup>rd</sup>  
228 vaccination. The apparent broadening of responses to Omicron may be due to boosting of titers  
229 to cross-reactive epitopes or improved antibody affinity to shared epitopes, or both. For the

230 convalescent sera, high titers generally correlated with the highest cross-neutralization to  
231 Omicron. Continued studies of the breadth against multiple variants and duration of responses  
232 after booster vaccinations are urgently needed. In both vaccination and convalescent individuals,  
233 our studies suggest that booster vaccinations, even with the original ancestral vaccine antigen,  
234 could be beneficial in protecting against Omicron, in agreement with the rapidly accumulating  
235 data from many sources(3, 5, 6).

236 Lastly, nine of the fifteen clinical-grade nAbs under EUA or in late stages of clinical  
237 development had no measurable  $IC_{50}$  against Omicron compared to WT. Also, while most nAbs  
238 and cnAbs lost measurable potency, all polyclonal antibodies retained measurable, though  
239 reduced with  $IC_{50}$ . Careful selection of therapeutic antibodies is needed according to variant  
240 prevalence. As Omicron continues to acquire additional mutations the products that remain  
241 effective could be jeopardized, underscoring the risk associated with this variant and its  
242 derivatives.

243 In summary, our findings indicate that booster doses of mRNA COVID-19 vaccines may  
244 afford an increase in protection against Omicron by inducing higher levels of neutralizing  
245 antibodies compared to two vaccine doses or the levels of neutralizing antibodies induced by  
246 SARS-CoV-2 infection from different variants. The strengths of this study include representation  
247 of a broad diversity of genotypes, including within-Delta diversity, comparable sampling times  
248 between convalescent and vaccinated subjects, the use of cartography methods, and the  
249 availability of subject demographics to interpret how host characteristics may influence Omicron  
250 humoral immunity. The limitations of our study include the relatively small numbers of study  
251 subjects, restricted timing of sera collection, and the use of a pseudovirus platform as a surrogate  
252 to authentic SARS-CoV-2 viruses. Ultimately neutralization titers need to be tied to clinical

253 outcomes. The rapid and unpredictable evolution of SARS-CoV-2 requires continued  
254 development and assessments of medical countermeasures.

## 255 **MATERIALS AND METHODS**

### 256 **Vaccinated participants**

257 Details of the PASS study protocol, including the inclusion/exclusion criteria, have been  
258 published(17). Full details are in the Supplemental Material. Briefly, generally healthy  
259 healthcare workers without a history of SARS-CoV-2 infection at screening were enrolled. The  
260 study began in August 2020 and involved monthly research clinic visits to obtain serum for  
261 longitudinal SARS-CoV-2 antibody testing. The subset of participants included in this study  
262 received three doses of Pfizer/BNT162b2 vaccine; none had a PCR-confirmed SARS-CoV-2  
263 infection during follow-up. Participants' serially-collected serum samples were screened for  
264 immunoglobulin G (IgG) reactivity with SARS-CoV-2 spike protein and nucleocapsid protein  
265 (N) using a multiplex microsphere-based immunoassay, as described(22).

### 266 **Unvaccinated infections - study population and general study design**

267 The EPICC study is a cohort study of U.S. Military Health System (MHS) beneficiaries that  
268 includes those with a history of SARS-CoV-2 infection, as described previously(19). Full details  
269 are in Supplemental Material. Enrollment occurred at six Military Treatment Facilities (MTFs).  
270 Demographic, comorbidity, COVID illness characteristics, and vaccination status were obtained  
271 from the clinical case report form and/or the MHS Data Repository. Biospecimen collection  
272 included serial serum samples and upper respiratory specimen swabs.

273

### 274 **Diagnosis of SARS-CoV-2 infection and genotyping of infections used for convalescent sera**

275 SARS-CoV-2 infection was determined by positive clinical laboratory PCR test performed at the  
276 enrolling clinical site, or a follow-up upper respiratory swab collected as part of the EPICC  
277 study. The specific clinical PCR assay employed at the MTF varied. The follow-up PCR assay  
278 (for EPICC specimens) was the SARS-CoV-2 (2019-nCoV) CDC qPCR Probe Assay research  
279 use only kits (IDT, Coralville, IA)(23); details are in the Supplemental Material. Whole viral  
280 genome sequencing was performed on extracted SARS-CoV-2 RNA from PCR-positive  
281 specimens; details are in the Supplemental Material. The Pango classification tool ([https://cov-](https://cov-lineages.org/)  
282 [lineages.org/](https://cov-lineages.org/)) was used for genotype classification (version 3.1.17).

283

#### 284 **Ethics**

285 The PASS (IDCRP-126) and EPICC (IDCRP-085) studies were approved by the Uniformed  
286 Services University of the Health Sciences Institutional Review Board (IRB) in compliance with  
287 all applicable Federal regulations governing the protection of human participants. All PASS and  
288 EPICC study participants provided informed consent. The convalescent Beta sera, obtained from  
289 a traveler who had moderate-severe Covid-19 in the Republic of South Africa during the peak of  
290 the Beta (B.1.351) wave in January 2021, was obtained with informed consent and covered  
291 under the US Food and Drug Administration IRB approved expedited protocol # 2021-CBER-  
292 045.

293

#### 294 **SARS-Cov-2 pseudovirus production and neutralization assays**

295 Lentiviral pseudoviruses were generated and used in neutralization assays, as previously  
296 described(24). The Omicron spike expression plasmid was generously provided by Nicole Doria-  
297 Rose (Vaccine Research Center, National Institutes of Health). Neutralization assays were

298 performed on 293T-ACE2/TMPRSS2 cells stably expressing ACE2 and transmembrane serine  
299 protease 2 (BEI # NR-55293). Twenty-four clinical-stage therapeutic antibody products were  
300 provided by pharmaceutical companies to support the US government COVID-19 response  
301 efforts. The antibody identities are blinded for publications per an agreement with the  
302 companies. Neutralization curves were normalized to virus only controls and fitted using  
303 nonlinear regression curve (GraphPad Prism, La Jolla, CA). The antibody concentration or sera  
304 dilution corresponding to 50% neutralization was defined as NT<sub>50</sub> for sera or IC<sub>50</sub> for antibody  
305 products. Data reported are averages from at least two independent experiments, each with intra-  
306 assay duplicates.

307

### 308 **Antigenic cartography**

309 ACMACS antigenic cartography software (<https://acmacs-web.antigenic-441cartography.org/>)  
310 was used to create a geometric interpretation of neutralization titers against the WT, Delta, and  
311 Omicron variants. Each square in the map indicates one antigenic unit, corresponding to two-fold  
312 dilution of the antibody in the neutralization assay. Antigenic distance is measured in any  
313 direction of the map.

314

### 315 **Supplementary Materials**

316 Supplementary materials and methods

317 Table S1: SARS-CoV-2 genotypes for the infecting variants

318

## 319 **References and Notes**

- 320 1. D. Corti, L. A. Purcell, G. Snell, D. Veessler, Tackling COVID-19 with neutralizing monoclonal antibodies.  
321 *Cell* **184**, 3086-3108 (2021).
- 322 2. Y. Cao, J. Wang, F. Jian, T. Xiao, W. Song, A. Yisimayi, W. Huang, Q. Li, P. Wang, R. An, J. Wang, Y.  
323 Wang, X. Niu, S. Yang, H. Liang, H. Sun, T. Li, Y. Yu, Q. Cui, S. Liu, X. Yang, S. Du, Z. Zhang, X. Hao,  
324 F. Shao, R. Jin, X. Wang, J. Xiao, Y. Wang, X. S. Xie, B.1.1.529 escapes the majority of SARS-CoV-2  
325 neutralizing antibodies of diverse epitopes. *bioRxiv*, 2021.2012.2007.470392 (2021).
- 326 3. A. Rössler, L. Riepler, D. Bante, D. v. Laer, J. Kimpel, SARS-CoV-2 B.1.1.529 variant (Omicron) evades  
327 neutralization by sera from vaccinated and convalescent individuals. *medRxiv*, 2021.2012.2008.21267491  
328 (2021).
- 329 4. L. Lu, B. W.-Y. Mok, L. Chen, J. M.-C. Chan, O. T.-Y. Tsang, B. H.-S. Lam, V. W.-M. Chuang, A. W.-H.  
330 Chu, W.-M. Chan, J. D. Ip, B. P.-C. Chan, R. Zhang, C. C.-Y. Yip, V. C.-C. Cheng, K.-H. Chan, I. F.-N.  
331 Hung, K.-Y. Yuen, H. Chen, K. K.-W. To, Neutralization of SARS-CoV-2 Omicron variant by sera from  
332 BNT162b2 or Coronavac vaccine recipients. *medRxiv*, 2021.2012.2013.21267668 (2021).
- 333 5. N. Ikemura, A. Hoshino, Y. Higuchi, S. Taminishi, T. Inaba, S. Matoba, SARS-CoV-2 Omicron variant  
334 escapes neutralization by vaccinated and convalescent sera and therapeutic monoclonal antibodies.  
335 *medRxiv*, 2021.2012.2013.21267761 (2021).
- 336 6. E. Camerini, C. Saliba, J. E. Bowen, L. E. Rosen, K. Culap, D. Pinto, A. De Marco, S. K. Zepeda, J. di  
337 Iulio, F. Zatta, H. Kaiser, J. Noack, N. Farhat, N. Czudnochowski, C. Havenar-Daughton, K. R. Sprouse, J.  
338 R. Dillen, A. E. Powell, A. Chen, C. Maher, L. Yin, D. Sun, L. Soriaga, C. Gustafsson, H. Chu, N. M.  
339 Franko, J. Logue, N. T. Iqbal, I. Mazzitelli, J. Geffner, R. Grifantini, A. Gori, A. Riva, O. Giannini, A.  
340 Ceschi, P. Ferrari, A. Franzetti-Pellanda, C. Garzoni, C. Hebner, L. Purcell, L. Piccoli, M. S. Pizzuto, A. C.  
341 Walls, A. Telenti, H. W. Virgin, A. Lanzavecchia, D. Veessler, G. Snell, D. Corti, Broadly neutralizing  
342 antibodies overcome SARS-CoV-2 Omicron antigenic shift. *bioRxiv*, 2021.2012.2012.472269 (2021).
- 343 7. S. Cele, L. Jackson, K. Khan, D. Khoury, T. Moyo-Gwete, H. Tegally, C. Scheepers, D. Amoako, F.  
344 Karim, M. Bernstein, G. Lustig, D. Archary, M. Smith, Y. Ganga, Z. Jule, K. Reedoy, J. E. San, S.-H. Hwa,  
345 J. Giandhari, J. M. Blackburn, B. I. Gosnell, S. A. Karim, W. Hanekom, NGS-SA, C.-K. Team, A. von  
346 Gottberg, J. Bhiman, R. J. Lessells, M.-Y. S. Moosa, M. Davenport, T. de Oliveira, P. L. Moore, A. Sigal,

- 347 SARS-CoV-2 Omicron has extensive but incomplete escape of Pfizer BNT162b2 elicited neutralization  
348 and requires ACE2 for infection. *medRxiv*, 2021.2012.2008.21267417 (2021).
- 349 8. C. I. Kaku, E. R. Champney, J. Normark, C. E. Johnson, C. Ahlm, M. Sakharkar, M. E. Ackerman, M. N.  
350 E. Forsell, L. M. Walker, Broad anti-SARS-CoV-2 antibody immunity induced by heterologous  
351 ChAdOx1/mRNA-1273 prime-boost vaccination. *medRxiv*, 2021.2012.2013.21267598 (2021).
- 352 9. W. F. Garcia-Beltran, K. J. St Denis, A. Hoelzemer, E. C. Lam, A. D. Nitido, M. L. Sheehan, C. Berrios, O.  
353 Ofoman, C. C. Chang, B. M. Hauser, J. Feldman, D. J. Gregory, M. C. Poznansky, A. G. Schmidt, A. J.  
354 Iafrate, V. Naranbhai, A. B. Balazs, mRNA-based COVID-19 vaccine boosters induce neutralizing  
355 immunity against SARS-CoV-2 Omicron variant. *medRxiv*, 2021.2012.2014.21267755 (2021).
- 356 10. H. Gruell, K. Vanshylla, P. Tober-Lau, D. Hillus, P. Schommers, C. Lehmann, F. Kurth, L. E. Sander, F.  
357 Klein, mRNA booster immunization elicits potent neutralizing serum activity against the SARS-CoV-2  
358 Omicron variant. *medRxiv*, 2021.2012.2014.21267769 (2021).
- 359 11. F. Schmidt, F. Muecksch, Y. Weisblum, J. D. Silva, E. Bednarski, A. Cho, Z. Wang, C. Gaebler, M.  
360 Caskey, M. C. Nussenzweig, T. Hatziioannou, P. D. Bieniasz, Plasma neutralization properties of the  
361 SARS-CoV-2 Omicron variant. *medRxiv*, 2021.2012.2012.21267646 (2021).
- 362 12. K. Basile, R. J. Rockett, K. McPhie, M. Fennell, J. Johnson-Mackinnon, J. E. Agius, W. Fong, H. Rahman,  
363 D. Ko, L. Donovan, L. Hueston, C. Lam, A. Arnott, S. C.-A. Chen, S. Maddocks, M. V. O'Sullivan, D. E.  
364 Dwyer, V. Sintchenko, J. Kok, Improved neutralization of the SARS-CoV-2 Omicron variant after Pfizer-  
365 BioNTech BNT162b2 COVID-19 vaccine boosting. *bioRxiv*, 2021.2012.2012.472252 (2021).
- 366 13. I. Nemet, L. Kliker, Y. Lustig, N. S. Zuckerman, O. Erster, C. Cohen, Y. Kreiss, S. Alroy-Preis, G. Regev-  
367 Yochay, E. Mendelson, M. Mandelboim, Third BNT162b2 vaccination neutralization of SARS-CoV-2  
368 Omicron infection. *medRxiv*, 2021.2012.2013.21267670 (2021).
- 369 14. A. Wilhelm, M. Widera, K. Grikscheit, T. Toptan, B. Schenk, C. Pallas, M. Metzler, N. Kohmer, S. Hoehl,  
370 F. A. Helfritz, T. Wolf, U. Goetsch, S. Ciesek, Reduced Neutralization of SARS-CoV-2 Omicron Variant  
371 by Vaccine Sera and monoclonal antibodies. *medRxiv*, 2021.2012.2007.21267432 (2021).
- 372 15. N. Doria-Rose, X. Shen, S. D. Schmidt, S. O'Dell, C. McDanal, W. Feng, J. Tong, A. Eaton, M. Maglinao,  
373 H. Tang, R. L. Atmar, K. E. Lyke, L. Wang, y. Zhang, M. R. Gaudinski, W. P. Black, I. Gordon, M. Guech,  
374 J. E. Ledgerwood, J. N. Misasi, A. Widge, P. C. Roberts, J. Beigel, B. Korber, R. Pajon, J. R. Mascola, D.



- 375 C. Montefiori, Booster of mRNA-1273 Vaccine Reduces SARS-CoV-2 Omicron Escape from Neutralizing  
376 Antibodies. *medRxiv*, 2021.2012.2015.21267805 (2021).
- 377 16. J. M. Carreño, H. Alshammary, J. Tcheou, G. Singh, A. Raskin, H. Kawabata, L. Sominsky, J. Clark, D. C.  
378 Adelsberg, D. Bielak, A. S. Gonzalez-Reiche, P. P. S. Group, K. Srivastava, E. M. Sordillo, G. Bajic, H.  
379 van Bakel, V. Simon, F. Krammer, Activity of convalescent and vaccine serum against a B.1.1.529 variant  
380 SARS-CoV-2 isolate. *medRxiv*, 2021.2012.2020.21268134 (2021).
- 381 17. B. M. Jackson-Thompson, E. Goguet, E. D. Laing, C. H. Olsen, S. Pollett, K. M. Hollis-Perry, S. E.  
382 Maiolatesi, L. Illinik, K. F. Ramsey, A. E. Reyes, Y. Alcorta, M. A. Wong, J. Davies, O. Ortega, E.  
383 Parmelee, A. R. Lindrose, M. Moser, E. Graydon, A. G. Letizia, C. A. Duplessis, A. Ganesan, K. P. Pratt,  
384 A. M. Malloy, D. W. Scott, S. K. Anderson, A. L. Snow, C. L. Dalgard, J. H. Powers, 3rd, D. Tribble, T. H.  
385 Burgess, C. C. Broder, E. Mitre, Prospective Assessment of SARS-CoV-2 Seroconversion (PASS) study:  
386 an observational cohort study of SARS-CoV-2 infection and vaccination in healthcare workers. *BMC Infect*  
387 *Dis* **21**, 544 (2021).
- 388 18. E. D. Laing, C. D. Weiss, E. C. Samuels, S. A. A. Coggins, W. Wang, R. Wang, R. Vassell, S. L. Sterling,  
389 M. A. Tso, T. Conner, E. Goguet, M. Moser, B. M. Jackson-Thompson, L. Illinik, J. Davies, O. Ortega, E.  
390 Parmelee, M. Hollis-Perry, S. E. Maiolatesi, G. Wang, K. F. Ramsey, A. E. Reyes, Y. Alcorta, M. A.  
391 Wong, A. R. Lindrose, C. A. Duplessis, D. R. Tribble, A. M. W. Malloy, T. H. Burgess, S. D. Pollett, C. H.  
392 Olsen, C. C. Broder, E. Mitre, Durability of antibody responses and frequency of clinical and subclinical  
393 SARS-CoV-2 infection six months after BNT162b2 COVID-19 vaccination in healthcare workers.  
394 *medRxiv*, 2021.2010.2016.21265087 (2021).
- 395 19. S. A. Richard, S. D. Pollett, C. A. Lanteri, E. V. Millar, A. C. Fries, R. C. Maves, G. C. Utz, T. Lalani, A.  
396 Smith, R. M. Mody, A. Ganesan, R. E. Colombo, C. J. Colombo, D. A. Lindholm, C. Madar, S. Chi, N.  
397 Huprikar, D. T. Larson, S. E. Bazan, C. English, E. Parmelee, K. Mende, E. D. Laing, C. C. Broder, P. W.  
398 Blair, J. G. Chenoweth, M. P. Simons, D. R. Tribble, B. K. Agan, T. H. Burgess, E. C.-C. S. Group,  
399 COVID-19 Outcomes Among US Military Health System Beneficiaries Include Complications Across  
400 Multiple Organ Systems and Substantial Functional Impairment. *Open Forum Infect Dis* **8**, ofab556 (2021).

- 401 20. S. Lusvarghi, W. Wang, R. Herrup, S. N. Neerukonda, R. Vassell, L. Bentley, A. E. Eakin, K. J. Erlandson,  
402 C. D. Weiss, Key substitutions in the spike protein of SARS-CoV-2 variants can predict resistance to  
403 monoclonal antibodies, but other substitutions can modify the effects. *J Virol*, JVI0111021 (2021).
- 404 21. M. Schubert, F. Bertoglio, S. Steinke, P. A. Heine, M. A. Ynga-Durand, F. Zuo, L. Du, J. Korn, M.  
405 Milošević, E. V. Wenzel, H. Maass, F. Krstanović, S. Polten, M. Pribanić-Matešić, I. Brizić, A. Piralla, F.  
406 Baldanti, L. Hammarström, S. Dübel, A. Šustić, H. Marcotte, M. Strengert, A. Protić, Q. Pan  
407 Hammarström, L. Čičin-Šain, M. Hust, Human serum from SARS-CoV-2 vaccinated and COVID-19  
408 patients shows reduced binding to the RBD of SARS-CoV-2 Omicron variant in comparison to the original  
409 Wuhan strain and the Beta and Delta variants. *medRxiv*, 2021.2012.2010.21267523 (2021).
- 410 22. E. D. Laing, S. L. Sterling, S. A. Richard, N. J. Epsi, S. Coggins, E. C. Samuels, S. Phogat, L. Yan, N.  
411 Moreno, C. L. Coles, M. Drew, J. Mehalko, S. Merritt, K. Mende, V. Munster, E. de Wit, K. K. Chung, E.  
412 V. Millar, D. R. Tribble, M. P. Simons, S. D. Pollett, D. Esposito, C. Lanteri, G. T. Clifton, E. Mitre, T. H.  
413 Burgess, C. C. Broder, Antigen-based multiplex strategies to discriminate SARS-CoV-2 natural and  
414 vaccine induced immunity from seasonal human coronavirus humoral responses. *medRxiv*, (2021).
- 415 23. S. Jangra, C. Ye, R. Rathnasinghe, D. Stadlbauer, g. Personalized Virology Initiative study, F. Krammer,  
416 V. Simon, L. Martinez-Sobrido, A. Garcia-Sastre, M. Schotsaert, SARS-CoV-2 spike E484K mutation  
417 reduces antibody neutralisation. *Lancet Microbe*, (2021).
- 418 24. S. N. Neerukonda, R. Vassell, S. Lusvarghi, R. Wang, F. Echegaray, L. Bentley, A. E. Eakin, K. J.  
419 Erlandson, L. C. Katzelnick, C. D. Weiss, W. Wang, SARS-COV-2 Delta variant displays moderate  
420 resistance to neutralizing antibodies and spike protein properties of higher soluble ACE2 sensitivity,  
421 enhanced cleavage and fusogenic activity. *bioRxiv*, (2021).

422

## 423 **Acknowledgments:**

424 The authors wish to also acknowledge all who have contributed to the EPICC (IDCRP-085)  
425 COVID-19 study.

426

427 *Brooke Army Medical Center, Fort Sam Houston, TX:* Col J. Cowden; LTC M. Darling; S.  
428 DeLeon; Maj D. Lindholm; LTC A. Markelz; K. Mende; S. Merritt; T. Merritt; LTC N. Turner;  
429 CPT T. Wellington  
430  
431 *Carl R. Darnall Army Medical Center, Fort Hood, TX:* LTC S. Bazan; P.K Love  
432  
433 *Fort Belvoir Community Hospital, Fort Belvoir, VA:* N. Dimascio-Johnson; MAJ E. Ewers;  
434 LCDR K. Gallagher; LCDR D. Larson; A. Rutt  
435  
436 *Henry M. Jackson Foundation, Inc., Bethesda, MD:* P. Blair; J. Chenoweth; D. Clark  
437  
438 *Madigan Army Medical Center, Joint Base Lewis McChord, WA:* S. Chambers; LTC C.  
439 Colombo; R. Colombo; CAPT C. Conlon; CAPT K. Everson; COL P. Faestel; COL T. Ferguson;  
440 MAJ L. Gordon; LTC S. Grogan; CAPT S. Lis; COL C. Mount; LTC D. Musfeldt; CPT D.  
441 Odineal; LTC M. Perreault; W. Robb-McGrath; MAJ R. Sainato; C. Schofield; COL C. Skinner;  
442 M. Stein; MAJ M. Switzer; MAJ M. Timlin; MAJ S. Wood  
443  
444 *Naval Medical Center Portsmouth, Portsmouth, VA:* S. Banks; R. Carpenter; L. Kim; CAPT K.  
445 Kronmann; T. Lalani; LCDR T. Lee; LCDR A. Smith; R. Smith; R. Tant; T. Warkentien  
446  
447 *Naval Medical Center San Diego, San Diego, CA:* CDR C. Berjohn; S. Cammarata; N. Kirkland;  
448 D. Libraty; CAPT (Ret) R. Maves; CAPT (Ret) G. Utz  
449

450 *Tripler Army Medical Center, Honolulu, HI*: S. Chi; LTC R. Flanagan; MAJ M. Jones; C. Lucas;  
451 LTC (Ret) C. Madar; K. Miyasato; C. Uyehara  
452  
453 *Uniformed Services University of the Health Sciences, Bethesda, MD*: B. Agan; L. Andronescu;  
454 A. Austin; C. Broder; CAPT T. Burgess; C. Byrne; COL K Chung; J. Davies; C. English; N.  
455 Epsi; C. Fox; M. Fritschlanski; M. Grother; A. Hadley; COL P. Hickey; E. Laing; LTC C.  
456 Lanteri; LTC J. Livezey; A. Malloy; R. Mohammed; C. Morales; P. Nwachukwu; C. Olsen; E.  
457 Parmelee; S. Pollett; S. Richard; J. Rozman; J. Rusiecki; E. Samuels; M. Sanchez; A. Scher;  
458 CDR M. Simons; A. Snow; K. Telu; D. Tribble; L. Ulomi  
459  
460 *United States Air Force School of Medicine, Dayton, OH*: SSgt T. Chao; R. Chapleau; M.  
461 Christian; A. Fries; C. Harrington; S. Huntsberger; K. Lanter; E. Macias; J. Meyer; S. Purves; K.  
462 Reynolds; J. Rodriguez; C. Starr  
463  
464 *Womack Army Medical Center, Fort Bragg, NC*: B. Barton; LTC D. Hostler; LTC J. Hostler;  
465 MAJ K. Lago; C. Maldonado; J. Mehrer  
466  
467 *United States Army Medical Research Institute of Infectious Diseases, Frederick, MD*: MAJ J.  
468 Kugelman  
469  
470 *William Beaumont Army Medical Center, El Paso, TX*: MAJ T. Hunter; J. Mejia; R. Mody; R.  
471 Resendez; P. Sandoval; M. Wayman  
472

473 *Walter Reed National Military Medical Center, Bethesda, MD: I. Barahona; A. Baya; A.*  
474 *Ganesan; MAJ N. Huprikar; B. Johnson*

475

476 *Walter Reed Army Institute of Research, Silver Spring, MD: S. Peel*

477

478 We also thank Douglas Pratt and Hector Izurieta (US Food and Drug Administration) for critical  
479 review of the manuscript.

480

481 **Funding Statement:**

482 This work was supported by awards from the Defense Health Program (HU00012020067,  
483 HU00012120094, HU00012120104) and the National Institute of Allergy and Infectious Disease  
484 (HU00011920111). The PASS and EPICC protocols were executed by the Infectious Disease  
485 Clinical Research Program (IDCRP), a Department of Defense (DoD) program executed by the  
486 Uniformed Services University of the Health Sciences (USUHS) through a cooperative  
487 agreement by the Henry M. Jackson Foundation for the Advancement of Military Medicine, Inc.  
488 (HJF). This project has also been funded in part by the National Institute of Allergy and  
489 Infectious Diseases at the National Institutes of Health (NIAID/NIH), under an interagency  
490 agreement with USUHS (Y1-AI-5072), and by the Intramural Research Program of NIAID.  
491 Additional support was provided by institutional research funds from the US Food and Drug  
492 Administration (FDA) and NIAID/NIH through an interagency agreement (AAI21013-001-  
493 00000) with Center for Biologics Evaluation and Research, FDA, as part of the US Government  
494 COVID-19 response efforts.

495

496 **Author contributions:**

497 Conceptualization: SL, SDP, RV, EG, CCB, LB, KJE, EDL, THB, EM, CDW

498 Methodology: SL, SDP, SNN, WW, RV, ACF, EG, SAC, CCB, LB, KJE, EDL, LCK, EM,

499 CDW

500 Investigation: SL, SDP, SNN, WW, RW, RV, NJE, ACF, DAL, CJC, RM, AG, EG, SAC, GW,

501 LB, KJE, ECE, TL, CDW

502 Visualization: SL, SDP, WW, RV, LCK, CDW

503 Funding acquisition: SDP, AEE, DRT, THB, EM, CDW

504 Project administration: SDP, RV, BKA, MH-P, MPS, DRT, AEE, KJE, EDL, THB, EM, CDW

505 Supervision: SDP, CCB, EDL, EM, THB, CDW

506 Writing – original draft: SL, SDP, CDW

507 Writing – review & editing: SL, SDP, SNN, WW, RW, RV, NJE, ACF, BKA, DAL, CJC, RM,

508 ECE, TL, AG, EG, MH-P, SAC, MPS, LCK, GW, CCB, DRT, LB, AEE, KJE, EDL, THB, EM,

509 CDW

510

511 **Competing interests:**

512 **Potential conflicts of interest.** S. D. P., T. H. B, and D.R.T. report that the Uniformed Services

513 University (USU) Infectious Diseases Clinical Research Program (IDCRP), a US Department of

514 Defense institution, and the Henry M. Jackson Foundation (HJF) were funded under a

515 Cooperative Research and Development Agreement to conduct an unrelated phase III COVID-19

516 monoclonal antibody immunoprophylaxis trial sponsored by AstraZeneca. The HJF, in support

517 of the USU IDCPR, was funded by the Department of Defense Joint Program Executive Office

518 for Chemical, Biological, Radiological, and Nuclear Defense to augment the conduct of an

519 unrelated phase III vaccine trial sponsored by AstraZeneca. Both of these trials were part of the  
520 US Government COVID-19 response.

521

522 **Disclaimer:** E. Laing, T. Burgess, D. Tribble, A Fries, C. Broder, E. Mitre, M. Hollis-Perry, S.  
523 Lusvarghi, S. Pollett, SN. Neerukonda, W. Wang, R. Wang, R. Vassell, LC. Katzelnick, L  
524 Bentley, AE. Eakin, KJ. Erlandson and CD. Weiss are service members or employees of the U.S.  
525 Government. This work was prepared as part of their official duties. Title 17 U.S.C. §105  
526 provides that ‘Copyright protection under this title is not available for any work of the United  
527 States Government.’ Title 17 U.S.C. §101 defines a U.S. Government work as a work prepared  
528 by a military service member or employee of the U.S. Government as part of that person’s  
529 official duties.

530 The contents of this publication are the sole responsibility of the author (s) and do not  
531 necessarily reflect the views, opinions, or policies of Uniformed Services University of the  
532 Health Sciences (USUHS); the Department of Defense (DoD); the Departments of the Army,  
533 Navy, or Air Force; the Defense Health Agency, Brooke Army Medical Center; Walter Reed  
534 National Military Medical Center; Naval Medical Center San Diego; Madigan Army Medical  
535 Center; United States Air Force School of Aerospace Medicine; Fort Belvoir Community  
536 Hospital; the Henry M. Jackson Foundation for the Advancement of Military Medicine Inc; the  
537 National Institutes of Health; the Office of the Assistance Secretary for Preparedness and  
538 Response, US Department of Health and Human Services (HHS); the Biomedical Advanced  
539 Research and Development Authority, HHS; or the US Food and Drug Administration. Mention  
540 of trade names, commercial products, or organizations does not imply endorsement by the U.S.

541 Government. The investigators have adhered to the policies for protection of human subjects as  
542 prescribed in 45 CFR 46.

543

544 **Group authors EPICC and PASS (MEDLINE indexed):**

545 Brooke Army Medical Center, Fort Sam Houston, TX: Katrin Mende

546 Clinical Trials Center, Infectious Diseases Directorate, Naval Medical Research Center, Silver

547 Spring, MD, USA: Christopher Duplessis, Kathleen F. Ramsey, Anatalio E. Reyes, Yolanda

548 Alcorta, Mimi A. Wong, Santina Maiolatesi, Keishla Morales Padilla

549 Fort Belvoir Community Hospital, Fort Belvoir, VA: Derek Larson

550 Madigan Army Medical Center, Joint Base Lewis McChord, WA: Rhonda E. Colombo

551 Naval Medical Center Portsmouth, Portsmouth, VA: Alfred Smith

552 Uniformed Services University of the Health Sciences, Bethesda, MD: Stephanie Richard, Julia

553 Rozman, Alyssa R. Lindrose, Matthew Moser, Belinda Jackson-Thompson, Margaret Sanchez-

554 Edwards, Luca Illinik, Julian Davies, Orlando Ortega, Edward Parmelee

555 United States Army Medical Research Institute of Infectious Diseases, Frederick, MD: MAJ J.

556 Kugelman

557 Walter Reed National Military Medical Center, Bethesda, MD: Nikhil Huprikar



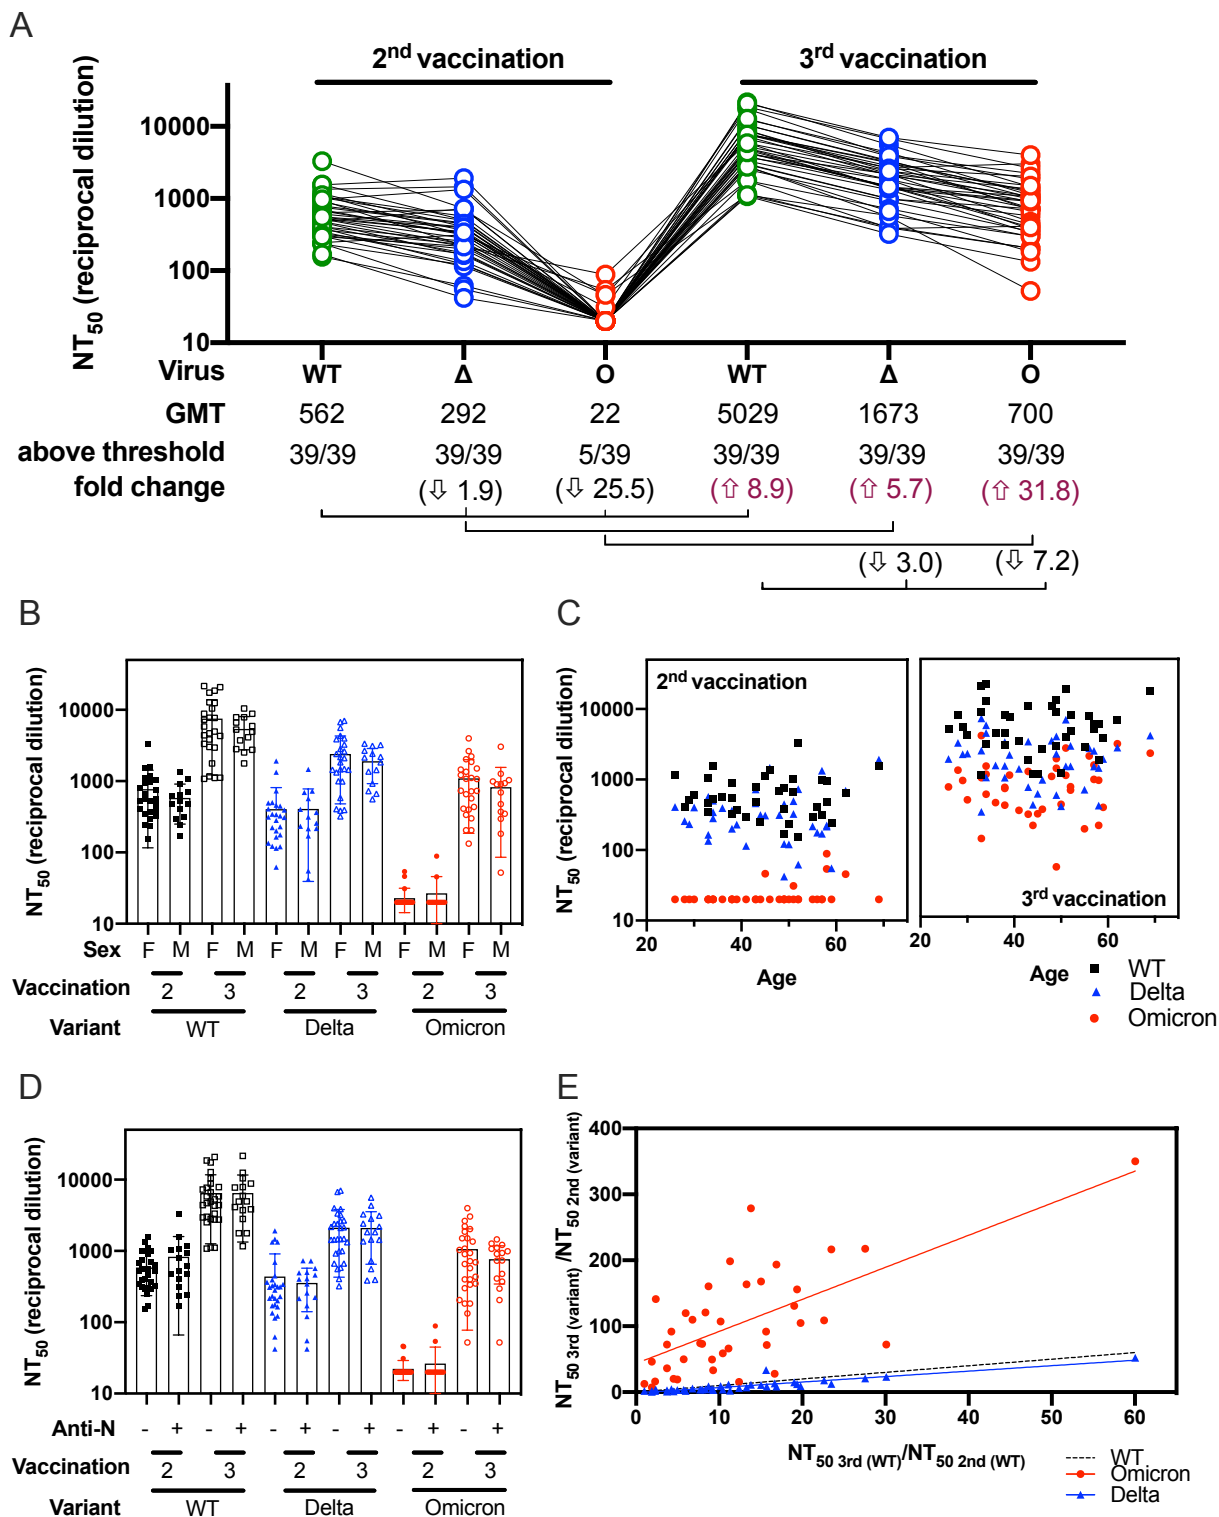

558

559

560 **Fig. 1. Sensitivity of the Omicron variant to neutralization by Pfizer/BNT162b2 vaccinee**  
561 **sera.** (A) Neutralization assays were performed using lentiviral pseudoviruses bearing SARS-  
562 CoV-2 WT (B.1 lineage, D614G), Delta ( $\Delta$ , B.1.617.2 lineage, T19R, G142D, E156-, F157-,  
563 R158G, L452R, T478K, D614G, P681R and D950N) and Omicron (O, B.1.1.529 lineage, A67V,  
564 del69-70, T95I, del142-144, Y145D, del211, L212I, ins214EPE, G339D, S371L, S373P, S375F,  
565 K417N, N440K, G446S, S477N, T478K, E484A, Q493R, G496S, Q498R, N501Y, Y505H,  
566 T547K, D614G, H655Y, N679K, P681H, N764K, D796Y, N856K, Q954H, N969K and L981F)  
567 with sera from 39 healthcare workers after immunization with two and three doses of  
568 Pfizer/BNT162b2 vaccine. Sera was obtained at a mean of  $30 \pm 11$  days after immunization with  
569 two doses and at a mean of  $43 \pm 17$  days after booster vaccination. Each serum was run in  
570 duplicate in two independent experiments against each pseudovirus to determine the 50%  
571 neutralization titer ( $NT_{50}$ ). The geometric means titers (GMT), the number of  $NT_{50}$  above  
572 threshold (1:40) and the fold change are indicated. Titers below 1:40 were set at 20 to calculate  
573 GMTs. Arrows indicate increase or decrease relative to WT. Connecting lines indicate serum  
574 from the same individual. The demographic information for this sera cohort is provided in Table  
575 1. (B)  $NT_{50}$  by sex after 2<sup>nd</sup> or 3<sup>rd</sup> vaccination. (C)  $NT_{50}$  by age after 2<sup>nd</sup> and 3<sup>rd</sup> vaccination. (D)  
576 2<sup>nd</sup> or 3<sup>rd</sup> vaccination  $NT_{50}$  according to anti-N (nucleocapsid protein) seroconversion between  
577 2<sup>nd</sup> and 3<sup>rd</sup> vaccination. (E) The ratios between the neutralization titers after the 3<sup>rd</sup> and the 2<sup>nd</sup>  
578 immunization for Omicron and Delta were plotted against the corresponding ratios for WT. For  
579 panels B-E, black squares correspond to WT, blue triangles correspond to Delta and red circles  
580 correspond to Omicron.

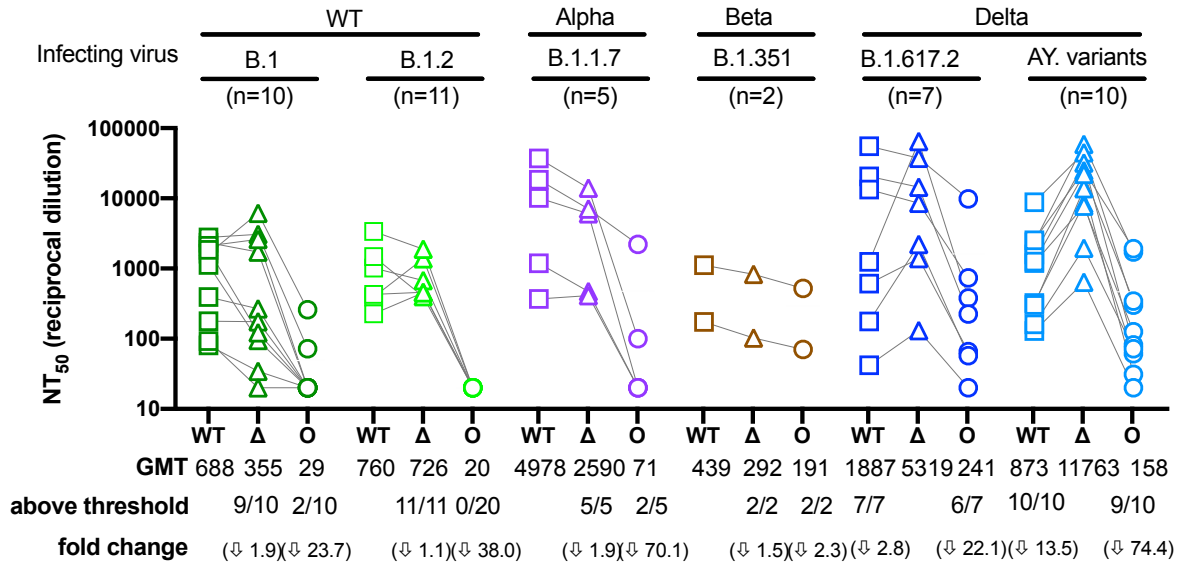

581

582 **Fig. 2. Sensitivity of the Omicron variant to neutralization by convalescent sera**

583 Neutralization assays were performed using convalescent sera from persons infected with  
 584 genotyped variants from B.1, B.1.2, B.1.1.7, B.1.351, B.1.617.2, AY.14, AY.25, AY.44, AY.47,  
 585 AY.62, AY.74 or AY.119 lineages (Table 2 and Supplementary Table). Both B.1 and B.1.2 have  
 586 no mutations in the receptor binding domain and were therefore considered WT, whereas some  
 587 of the AY mutants have additional mutations in the RBD relative to B.1.617.2. Each serum was  
 588 run in duplicate against WT, Delta, and Omicron to determine the NT<sub>50</sub>. The geometric means  
 589 (GMT), the number of NT<sub>50</sub> above threshold (1:40) and the fold change are indicated. Titers that  
 590 did not inhibit at the lowest dilution tested (1:40) were assigned a titer of 20 for GMT  
 591 calculations. Arrows indicate decrease relative to the infecting variant. Connecting lines indicate  
 592 serum from the same individual. Data shown represent two independent experiments each with  
 593 an intra-assay duplicate. Squares correspond to WT, triangles correspond to Delta, and circles  
 594 correspond to Omicron.

595

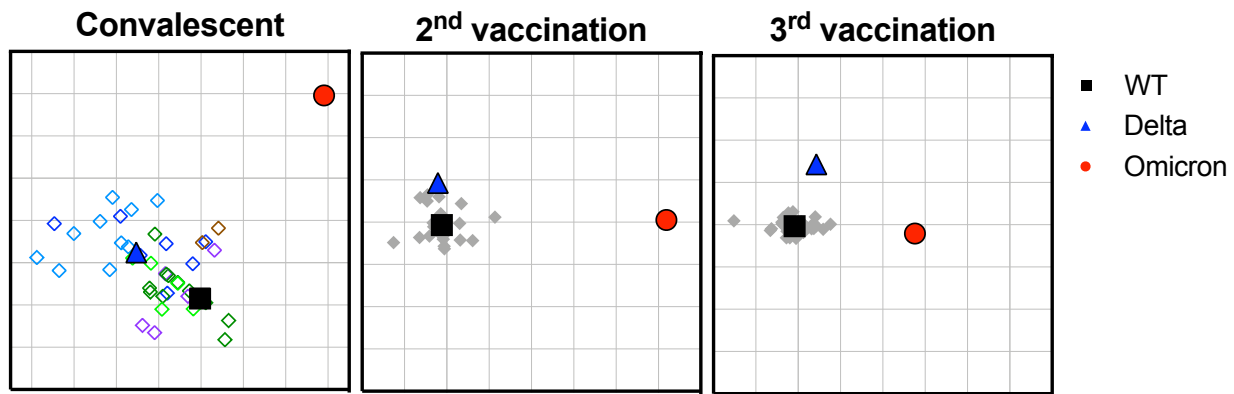

596

597 **Fig. 3. Antigenic cartography of convalescent and vaccinee sera against WT, Delta and**  
598 **Omicron.** Antigenic maps were separately generated from convalescent (left panel), 2<sup>nd</sup>  
599 vaccination (middle panel) or 3<sup>rd</sup> vaccination (right panel) sera. Convalescent sera are shown in  
600 diamonds as follows: B.1 (dark green), B.1.2 (light green), B.1.1.7 (purple), B.1.351 (brown),  
601 AY variants (light blue), and B.1.617.2 (dark blue). Gray diamonds correspond to post-  
602 vaccination sera. Each grid square corresponds to 2-fold dilution in the neutralization assay.  
603 Black squares correspond to WT variant. Blue triangles correspond to Delta variant. Red circle  
604 corresponds to Omicron variant.

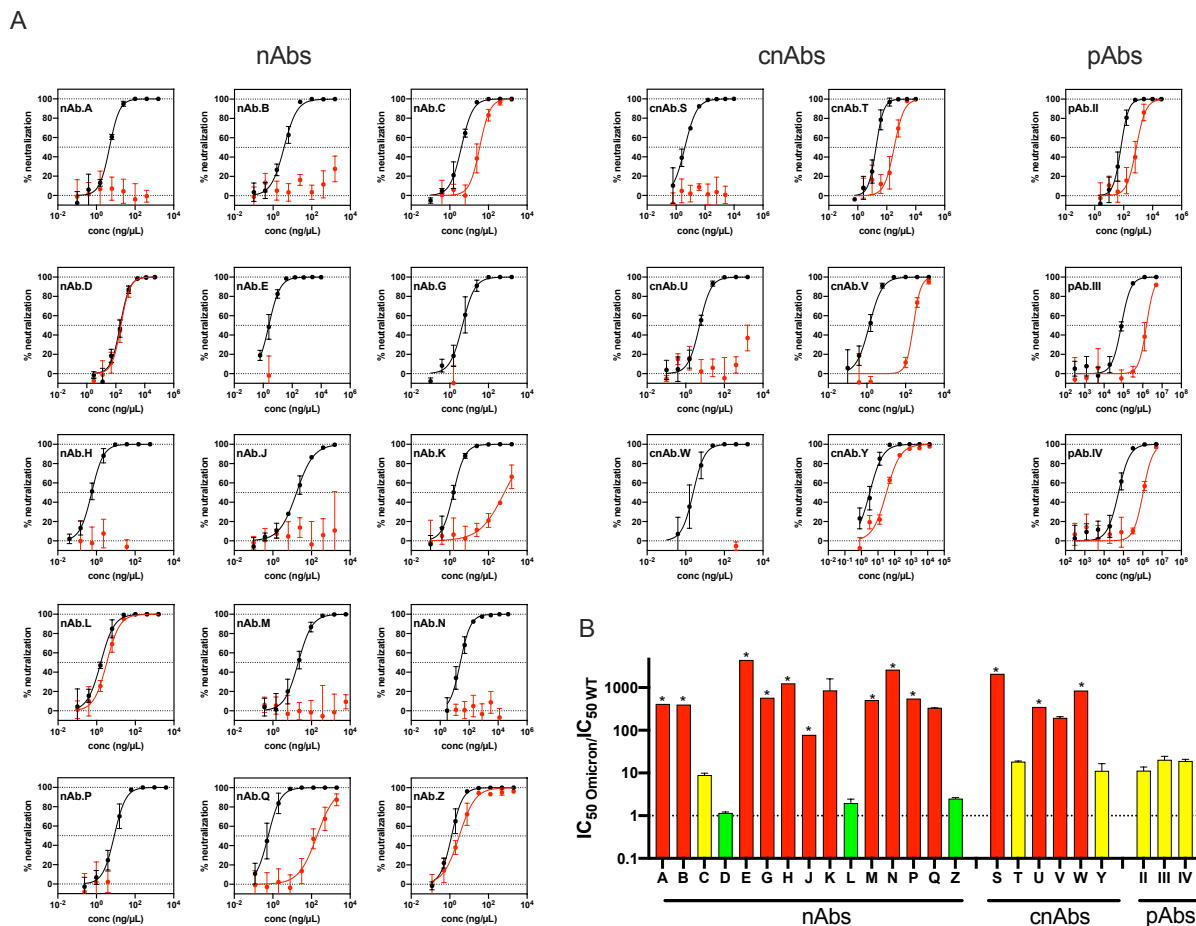

605

606 **Fig. 4. Neutralization of Omicron by therapeutic antibodies.** (A) Neutralization curves for  
 607 each one of the 24 therapeutic antibody products against WT (black) and Omicron (red). (B) Bar  
 608 graph showing the ratio between the IC<sub>50</sub> of Omicron and WT for all the antibody products. The  
 609 sensitivity of the Omicron variant against 15 monoclonal antibodies (nAbs), 6 combination nAbs  
 610 products (cnAbs), and 3 polyclonal antibodies (pAbs). Red indicates IC<sub>50</sub> resistance ratios >50,  
 611 yellow indicates moderate resistance with IC<sub>50</sub> ratios between 5-50, and green indicates  
 612 sensitivity comparable to WT with IC<sub>50</sub> ratios <5. Antibodies for which complete neutralization  
 613 was not achieved at the highest concentration tested are denoted by \*. Data shown represent two  
 614 independent experiments each with an intra-assay duplicate.

615

616 **Table 1. Demographic data for participants receiving Pfizer/BNT162b2 initial vaccine**  
617 **series and booster**

|                                                                 | <b>N (%)</b> |
|-----------------------------------------------------------------|--------------|
| <b>Sex</b>                                                      |              |
| Female                                                          | 25 (64.1)    |
| Male                                                            | 14 (35.9)    |
| <b>Race</b>                                                     |              |
| White                                                           | 26 (66.6%)   |
| Asian                                                           | 8 (20.5%)    |
| Black                                                           | 4 (10.3%)    |
| Multiracial                                                     | 1 (2.6%)     |
| <b>Occupation</b>                                               |              |
| Nurse                                                           | 11 (28.2%)   |
| Physician                                                       | 11 (28.2%)   |
| Physical/Occupational/Recreational Therapist                    | 9 (23.1%)    |
| Medical Technician                                              | 3 (7.7%)     |
| Lab Personnel                                                   | 3 (7.7%)     |
| Social Worker                                                   | 1 (2.6%)     |
| Psychologist                                                    | 1 (2.6%)     |
| <b>Anti-N seroconversion after vaccination and before boost</b> |              |
| Positive                                                        | 17 (43.6%)   |
| Negative                                                        | 22 (56.3%)   |

---

**Age**

---

|                           |                       |
|---------------------------|-----------------------|
| Mean age $\pm$ SD (range) | 45 $\pm$ 11 (26 - 69) |
|---------------------------|-----------------------|

---

**Time between second vaccine and sample collection**

---

|                            |                       |
|----------------------------|-----------------------|
| Mean days $\pm$ SD (range) | 30 $\pm$ 11 (28 - 34) |
|----------------------------|-----------------------|

---

**Time between second vaccine and booster dose**

---

|                            |                        |
|----------------------------|------------------------|
| Mean days $\pm$ SD (range) | 267 $\pm$ 14 (218-310) |
|----------------------------|------------------------|

---

**Time between booster dose and sample collection**

---

|                            |                      |
|----------------------------|----------------------|
| Mean days $\pm$ SD (range) | 43 $\pm$ 17 (7 - 93) |
|----------------------------|----------------------|

---

618

619

**Table 2: Characteristics of unvaccinated infections providing convalescent sera**

| <b>N = 39</b>                                                     |                              |
|-------------------------------------------------------------------|------------------------------|
| <b>Gender</b>                                                     |                              |
| Female                                                            | 14 (35.9%)                   |
| Male                                                              | 25 (64.1%)                   |
| <b>Race</b>                                                       |                              |
| White                                                             | 29 (74.4%)                   |
| Asian                                                             | 1 (2.6%)                     |
| Black                                                             | 6 (15.4%)                    |
| Multiracial                                                       | 3 (7.7%)                     |
| <b>Age</b>                                                        |                              |
| Mean age $\pm$ SD (range)                                         | 41.1 $\pm$ 20 (1.4 - 73.2)   |
| <b>Charlson comorbidity index</b>                                 |                              |
| 0                                                                 | 20 (51.3%)                   |
| 1-2                                                               | 10 (25.6%)                   |
| 3-4                                                               | 5 (12.8%)                    |
| >5                                                                | 4 (10.3%)                    |
| <b>Time between infection symptom onset and sample collection</b> |                              |
| Mean days $\pm$ SD (range)                                        | 30.2 $\pm$ 9.3 (14.0 - 51.0) |
| <b>Severity of initial infection</b>                              |                              |
| Outpatient                                                        | 23 (59.0%)                   |
| Hospitalized                                                      | 16 (41.0%)                   |
| <b>Infecting genotype*</b>                                        |                              |



|           |            |
|-----------|------------|
| AY.119    | 1 (2.6%)   |
| AY.14     | 2 (5.1%)   |
| AY.25     | 3 (7.7%)   |
| AY.44     | 1 (2.6%)   |
| AY.47     | 1 (2.6%)   |
| AY.62     | 1 (2.6%)   |
| AY.74     | 1 (2.6%)   |
| B.1       | 10 (25.6%) |
| B.1.1.7   | 5 (12.8%)  |
| B.1.2     | 6 (15.4%)  |
| B.1.351   | 1 (2.6%)   |
| B.1.617.2 | 7 (17.9%)  |

---

620 \* Genotypes assigned based on Pango 3.1.17 (2021-12-06). The genotype of the infecting variant  
621 was determined in all cases except for one, a traveler who had moderate-severe Covid-19  
622 (outpatient) in the Republic of South Africa during the peak of the Beta (B.1.351) wave in  
623 January 2021 (FDA IRB Study # 2021-CBER-045).

624

625
